# Supplementary material for: (±)-Pestalachloride D, an Antibacterial Racemate of Chlorinated Benzophenone Derivative from a Soft Coral-Derived Fungus Pestalotiopsis sp
Source: PubMed Central journal article supplement (PMC3705387; doi:10.3390/md11041050), 2013-03-28
Supplement: marinedrugs-11-01050-s001.pdf [file marinedrugs-11-01050-s001.pdf]

# Supplementary Information

## Table of Content

|                                                                                                                                             |   |
|---------------------------------------------------------------------------------------------------------------------------------------------|---|
| <b>Figure S1.</b> $^1\text{H}$ NMR (400 MHz) spectrum of ( $\pm$ )-pestalachloride D ( <b>1</b> ) in $\text{CDCl}_3$ .                      | 2 |
| <b>Figure S2.</b> $^{13}\text{C}$ NMR and DEPT (100 MHz) spectra of ( $\pm$ )-pestalachloride D ( <b>1</b> ) in $\text{CDCl}_3$ .           | 3 |
| <b>Figure S3.</b> EIMS spectrum of ( $\pm$ )-pestalachloride D ( <b>1</b> ).                                                                | 4 |
| <b>Figure S4.</b> HREIMS spectrum of ( $\pm$ )-pestalachloride D ( <b>1</b> ).                                                              | 5 |
| <b>Figure S5.</b> HPLC profiles of chiral Crownpak CR (+) column analysis of ( $\pm$ )-pestalachloride D ( <b>1</b> ).                      | 6 |
| <b>Figure S6.</b> $^1\text{H}$ NMR (400 MHz) spectrum of pestalachloride C ( <b>2</b> ) in $\text{CDCl}_3$ .                                | 6 |
| <b>Figure S7.</b> $^{13}\text{C}$ NMR and DEPT (100 MHz) spectra of pestalachloride C ( <b>2</b> ) in $\text{CDCl}_3$ .                     | 7 |
| <b>Table S1.</b> $^1\text{H}$ and $^{13}\text{C}$ NMR Data for ( $\pm$ )-pestalachloride D ( <b>1</b> ) and pestalachloride C ( <b>2</b> ). | 8 |

**Figure S1.**  $^1\text{H}$  NMR (400 MHz) spectrum of ( $\pm$ )-pestalchloride D (1) in  $\text{CDCl}_3$ .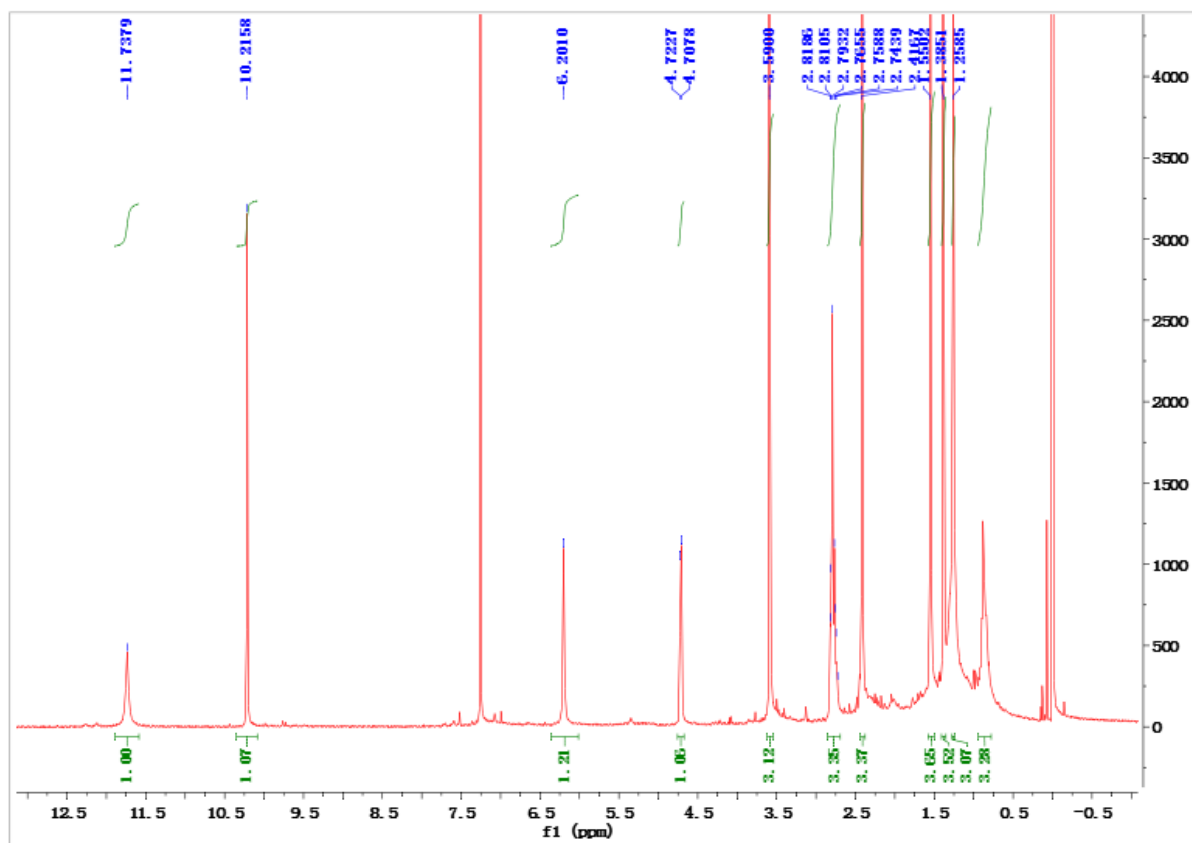

**Figure S2.**  $^{13}\text{C}$  NMR and DEPT (100 MHz) spectra of ( $\pm$ )-pestalachloride D (**1**) in  $\text{CDCl}_3$ .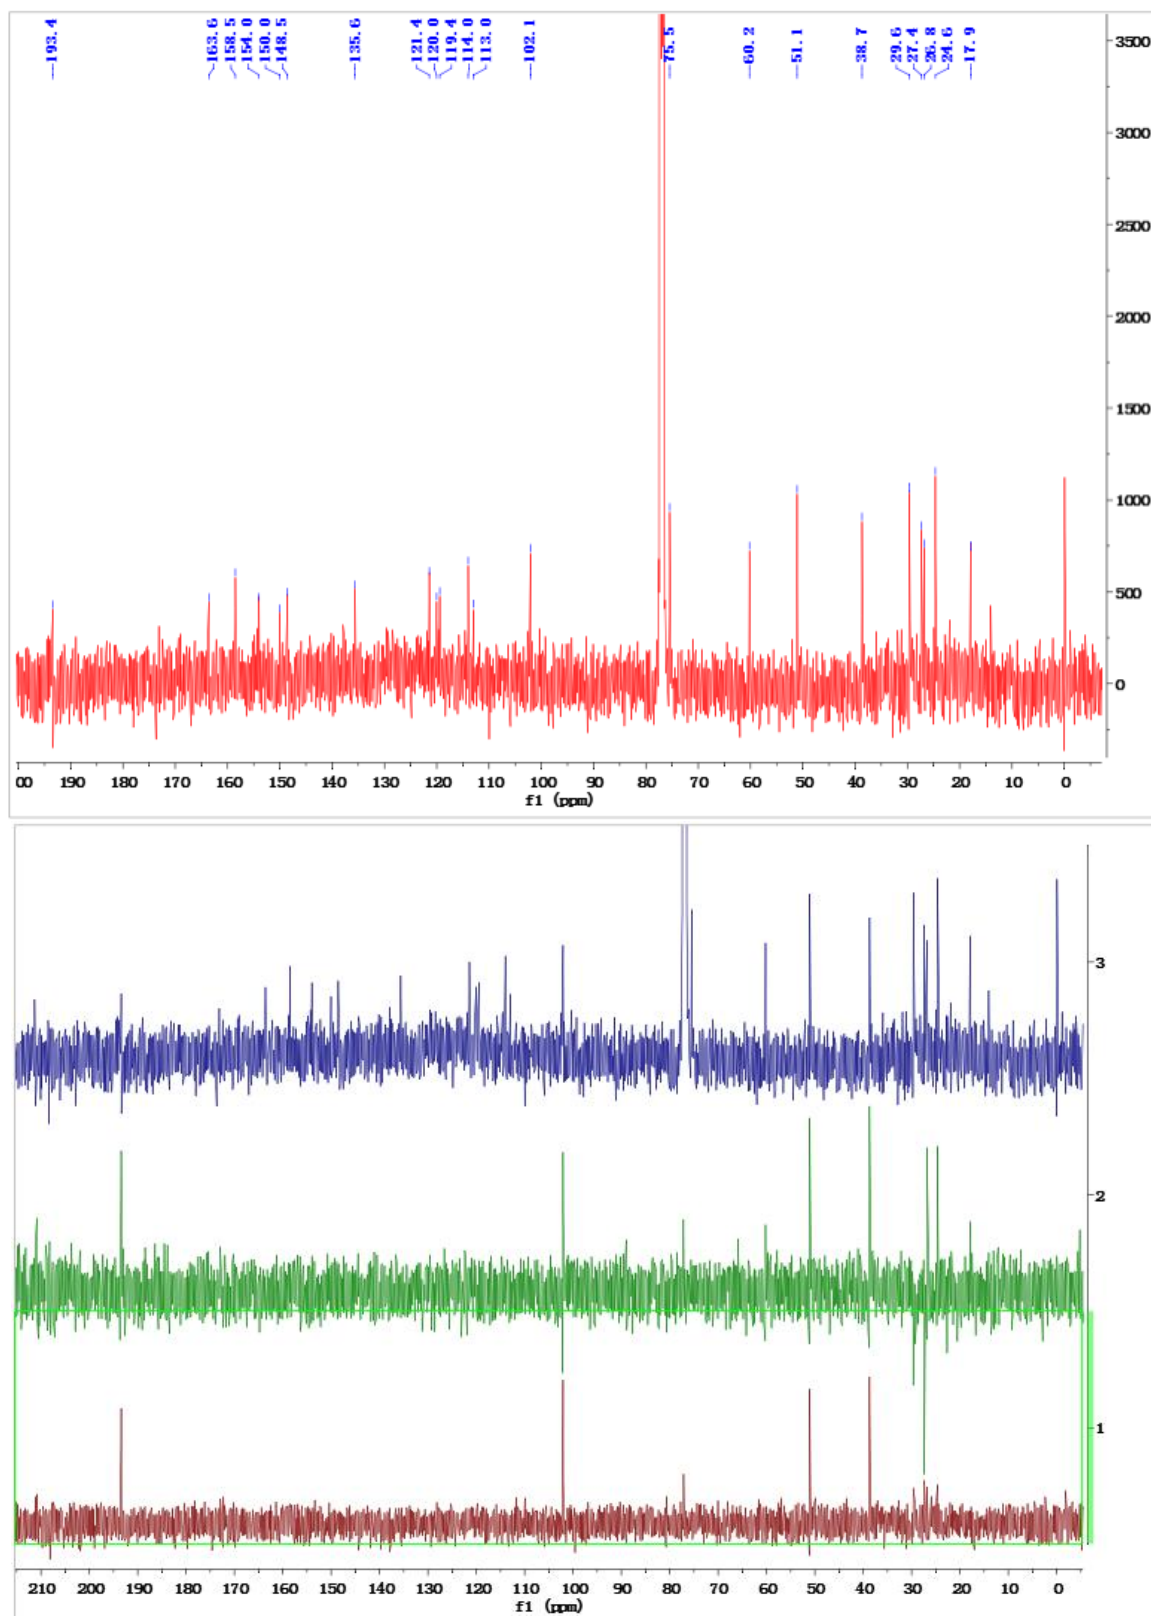

**Figure S3.** EIMS spectrum of ( $\pm$ )-pestalachloride D (1).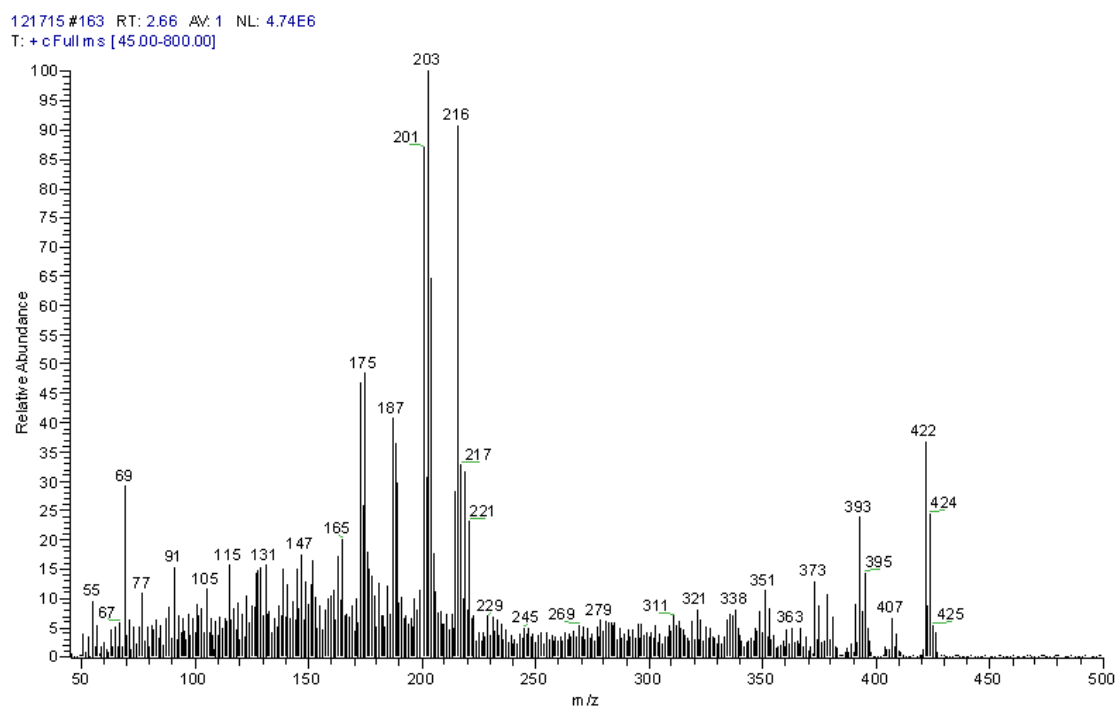

**Figure S4.** HREIMS spectrum of (±)-pestalachloride D (1).

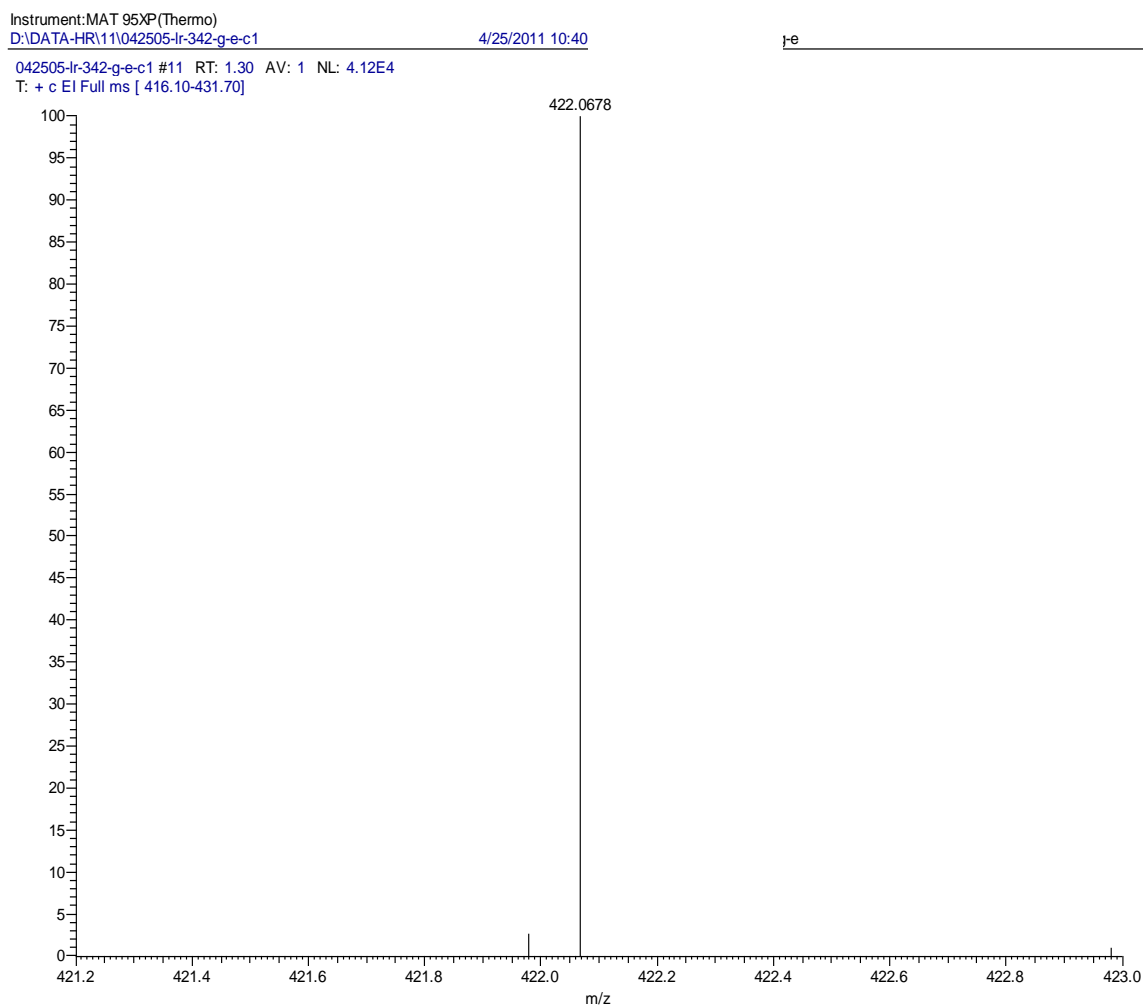

**Figure S5.** HPLC profiles of chiral Crownpak CR (+) column analysis of ( $\pm$ )-pestalachloride D (**1**).

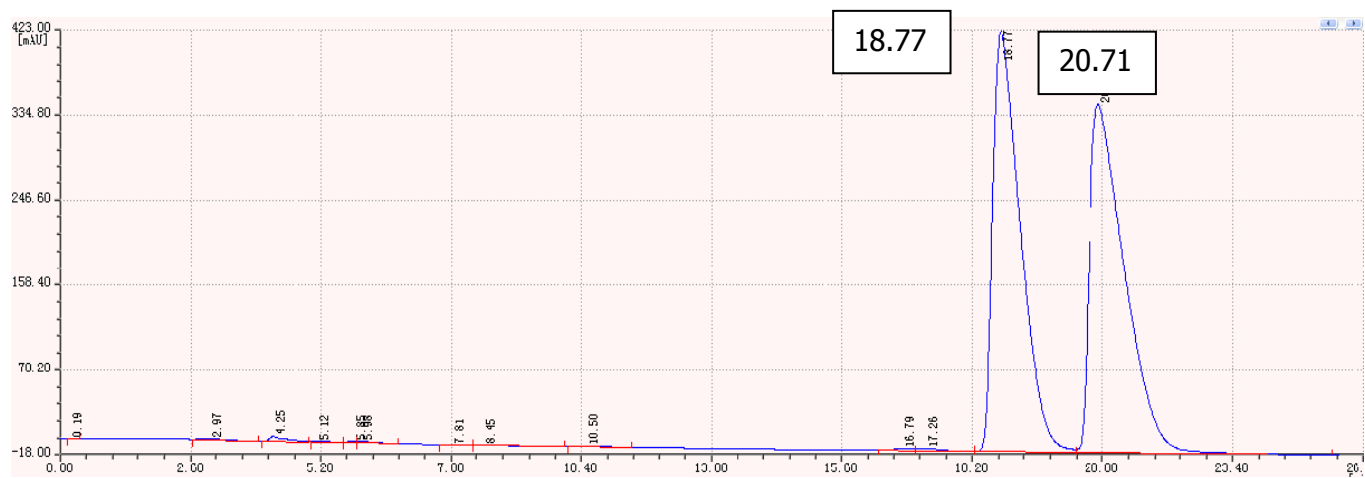

Eluted with 5% isopropanol in *n*-hexane at the flow rate of 0.8 mL/min.

**Figure S6.**  $^1\text{H}$  NMR (400 MHz) spectrum of pestalachloride C (**2**) in  $\text{CDCl}_3$ .

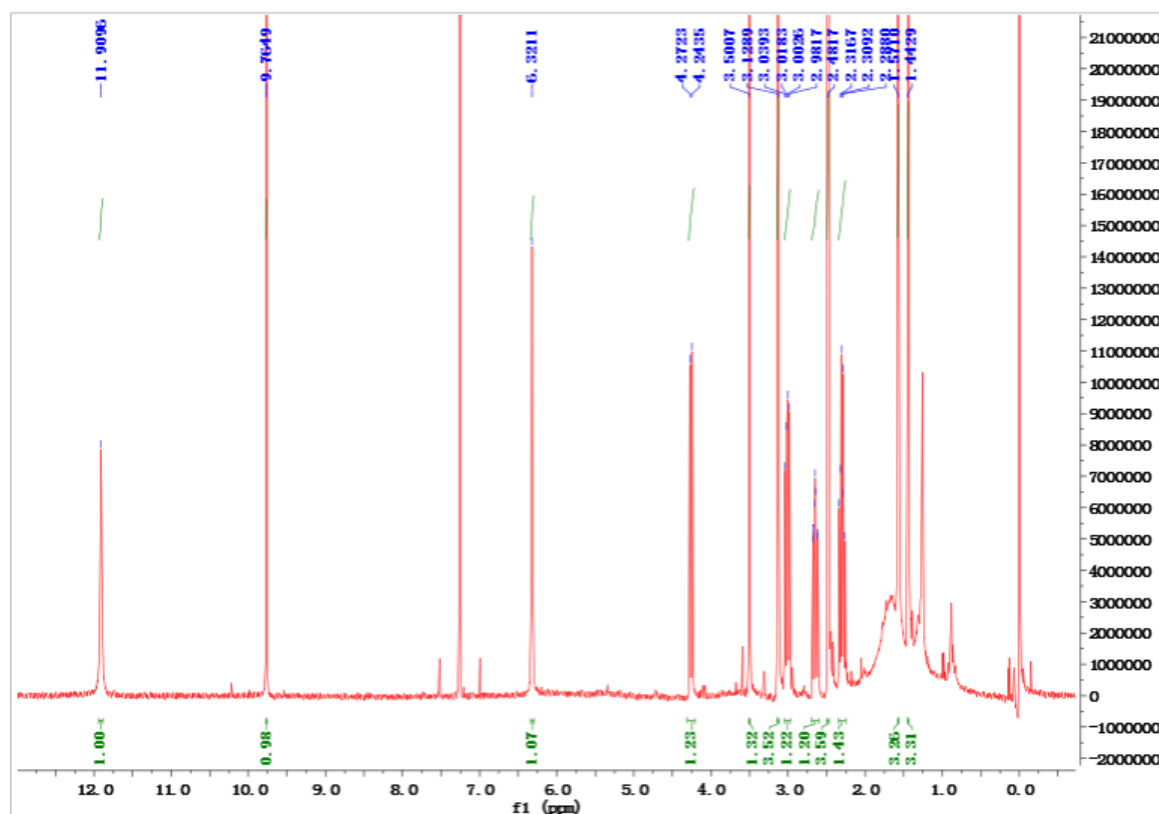

**Figure S7.**  $^{13}\text{C}$  NMR and DEPT (100 MHz) spectra of pestalachloride C (2) in  $\text{CDCl}_3$ .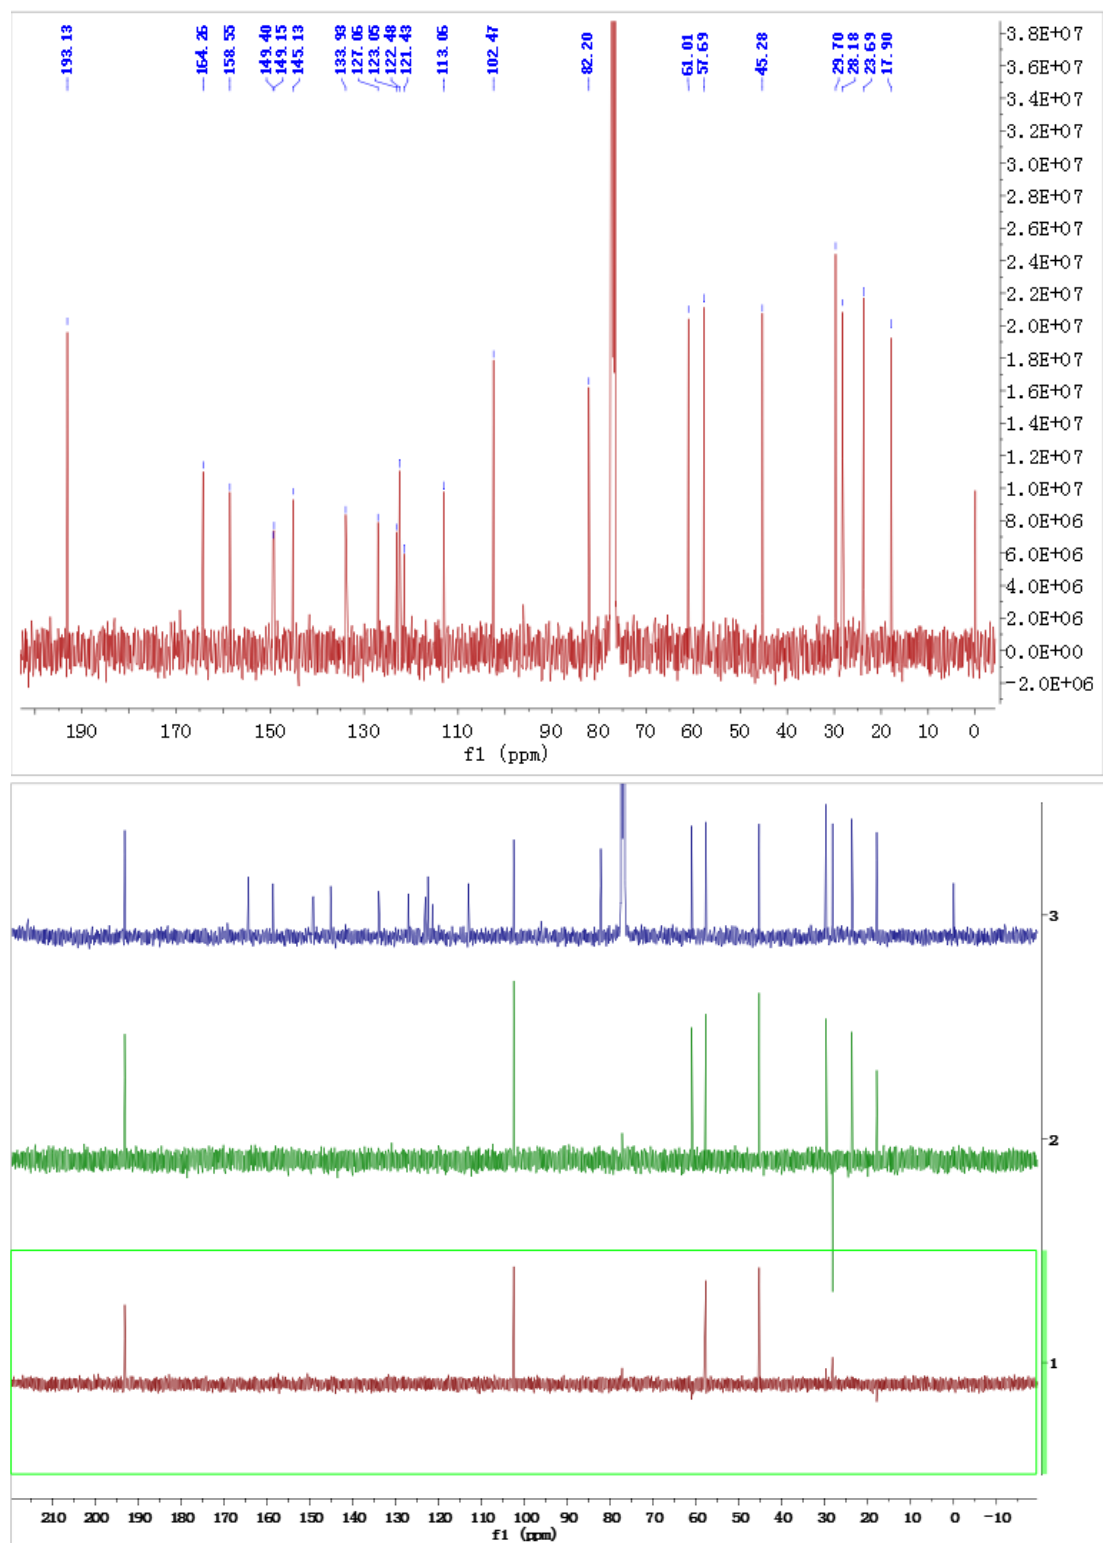

**Table S1.**  $^1\text{H}$  and  $^{13}\text{C}$  NMR Data for ( $\pm$ )-pestalachloride D (**1**) and pestalachloride C (**2**).

| Position | <b>1</b> <sup>a</sup> |                               | <b>2</b> <sup>a</sup> |                                 |
|----------|-----------------------|-------------------------------|-----------------------|---------------------------------|
|          | $\delta_{\text{C}}$   | $\delta_{\text{H}}$ (J in Hz) | $\delta_{\text{C}}$   | $\delta_{\text{H}}$ (J in Hz)   |
| 1        | 193.4                 | 10.21, s                      | 193.1                 | 9.76, s                         |
| 2        | 112.9                 | —                             | 113.1                 | —                               |
| 3        | 163.6                 | —                             | 164.3                 | —                               |
| 4        | 102.1                 | 6.20 (1H, s)                  | 102.5                 | 6.32 (1H, s)                    |
| 5        | 158.5                 | —                             | 158.6                 | —                               |
| 6        | 120.0                 | —                             | 127.0                 | —                               |
| 7        | 148.5                 | —                             | 145.1                 | —                               |
| 8        | 38.7                  | 4.71 (1H, d, 6.0)             | 45.3                  | 4.26 (1H, d, 11.5)              |
| 9        | 121.4                 | —                             | 123.1                 | —                               |
| 10       | 150.0                 | —                             | 149.4                 | —                               |
| 11       | 114.0                 | —                             | 121.4                 | —                               |
| 12       | 135.6                 | —                             | 133.9                 | —                               |
| 13       | 119.4                 | —                             | 122.5                 | —                               |
| 14       | 154.0                 | —                             | 149.2                 | —                               |
| 15       | 17.9                  | 2.42 (3H, s)                  | 17.9                  | 2.48 (3H, s)                    |
| 16       | 60.2                  | 3.59 (3H, s)                  | 61.0                  | 3.13 (3H, s)                    |
| 1' a     | 27.5                  | 2.81 (2H, overlapped)         | 28.2                  | 3.01 (1H, dd, 14.6, 8.4)        |
| 1' b     |                       | —                             | —                     | 2.64 (1H, ddd, 14.6, 11.3, 1.4) |
| 2'       | 51.1                  | 2.81 (1H, overlapped)         | 57.7                  | 2.30 (1H, ddd, 11.5, 11.3, 8.4) |
| 3'       | 75.6                  | —                             | 82.2                  | —                               |
| 4'       | 26.8                  | 1.55 (3H, s)                  | 29.7                  | 1.57 (3H, s)                    |
| 5'       | 24.6                  | 1.38 (3H, s)                  | 23.7                  | 1.44 (3H, s)                    |
| 3-OH     |                       | 11.74, brs,                   |                       | 11.91, brs                      |

<sup>a</sup> Measured at 400 MHz ( $^1\text{H}$ ) and 100 MHz ( $^{13}\text{C}$ ),  $\text{CDCl}_3$ .
