# Supplementary material for: (±)-Pestalachloride D, an Antibacterial Racemate of Chlorinated Benzophenone Derivative from a Soft Coral-Derived Fungus Pestalotiopsis sp
Source: MDPI journal article supplement (doi:10.3390/md11041050), 2013-03-28
Supplement: s2 [file s2]

marinedrugs-11-01050-s001.mol
  corina  04151404253D 1   1.00000     0.00000 
CORINA 3.49 0023  12.04.2013
 30 33  0  0  0  0  0  0  0  0999 V2000
    0.9482    3.8473    3.2435 C   0  0  0  0  0  0  0  0  0  0  0  0
    0.1382    2.7274    3.2459 C   0  0  0  0  0  0  0  0  0  0  0  0
    0.4676    1.6271    2.4642 C   0  0  0  0  0  0  0  0  0  0  0  0
    1.6083    1.6371    1.6843 C   0  0  0  0  0  0  0  0  0  0  0  0
    2.4185    2.7702    1.6823 C   0  0  0  0  0  0  0  0  0  0  0  0
    2.0875    3.8686    2.4596 C   0  0  0  0  0  0  0  0  0  0  0  0
   -0.3537    0.5410    2.4647 O   0  0  0  0  0  0  0  0  0  0  0  0
   -0.3922   -0.1906    1.2353 C   0  0  0  0  0  0  0  0  0  0  0  0
    1.0062   -0.6885    0.9034 C   0  0  0  0  0  0  0  0  0  0  0  0
    2.0200    0.4635    0.8405 C   0  0  0  0  0  0  0  0  0  0  0  0
    1.5502   -1.5591    2.0581 C   0  0  0  0  0  0  0  0  0  0  0  0
    3.0264   -1.2717    2.0882 C   0  0  0  0  0  0  0  0  0  0  0  0
    3.2960   -0.1187    1.3905 C   0  0  0  0  0  0  0  0  0  0  0  0
    4.0432   -2.0068    2.7044 C   0  0  0  0  0  0  0  0  0  0  0  0
    5.3468   -1.5303    2.5859 C   0  0  0  0  0  0  0  0  0  0  0  0
    5.6320   -0.3741    1.8862 C   0  0  0  0  0  0  0  0  0  0  0  0
    4.6069    0.3718    1.2633 C   0  0  0  0  0  0  0  0  0  0  0  0
   -1.3383   -1.3842    1.3806 C   0  0  0  0  0  0  0  0  0  0  0  0
   -0.8891    0.7225    0.1127 C   0  0  0  0  0  0  0  0  0  0  0  0
    0.9993   -1.2411   -0.0361 H   0  0  0  0  0  0  0  0  0  0  0  0
    3.7702   -3.1432    3.3934 O   0  0  0  0  0  0  0  0  0  0  0  0
    6.9162    0.0521    1.7965 O   0  0  0  0  0  0  0  0  0  0  0  0
    2.1593    0.7798   -0.1932 H   0  0  0  0  0  0  0  0  0  0  0  0
    3.5400    2.7983    0.9146 O   0  0  0  0  0  0  0  0  0  0  0  0
    3.4970    3.5997   -0.2678 C   0  0  0  0  0  0  0  0  0  0  0  0
    3.1047    5.2754    2.4485 Cl  0  0  0  0  0  0  0  0  0  0  0  0
    0.5881    5.0431    4.0870 C   0  0  0  0  0  0  0  0  0  0  0  0
   -1.2930    2.6953    4.2279 Cl  0  0  0  0  0  0  0  0  0  0  0  0
    4.8969    1.5996    0.5188 C   0  0  0  0  0  0  0  0  0  0  0  0
    5.8030    2.3245    0.8734 O   0  0  0  0  0  0  0  0  0  0  0  0
  1  2  2  0      
  2  3  1  0      
  3  4  2  0      
  4  5  1  0      
  5  6  2  0      
  6  1  1  0      
  3  7  1  0      
  7  8  1  0      
  8  9  1  0      
  9 10  1  0      
 10  4  1  0      
  9 11  1  0      
 11 12  1  0      
 12 13  2  0      
 13 10  1  0      
 12 14  1  0      
 14 15  2  0      
 15 16  1  0      
 16 17  2  0      
 17 13  1  0      
  8 18  1  0      
  8 19  1  0      
  9 20  1  0      
 14 21  1  0      
 16 22  1  0      
 10 23  1  0      
  5 24  1  0      
 24 25  1  0      
  6 26  1  0      
  1 27  1  0      
  2 28  1  0      
 17 29  1  0      
 29 30  2  0      
M  STY  1   1 SUP
M  SLB  1   1   1
M  SAL   1  2  29  30
M  SBL   1  1  32
M  SMT   1 CHO
M  SBV   1 32   -5.3738    4.4004
M  END
$$$$
