# Supplementary material for: (±)-Pestalachloride D, an Antibacterial Racemate of Chlorinated Benzophenone Derivative from a Soft Coral-Derived Fungus Pestalotiopsis sp
Source: MDPI journal article supplement (doi:10.3390/md11041050), 2013-03-28
Supplement: s3 [file s3]

marinedrugs-11-01050-s001.mol
  ChemDraw03101420452D

 30 33  0  0  0  0  0  0  0  0999 V2000
   -2.0512    0.9760    0.0000 C   0  0  0  0  0  0  0  0  0  0  0  0
   -2.0512    0.1510    0.0000 C   0  0  0  0  0  0  0  0  0  0  0  0
   -1.3367   -0.2615    0.0000 C   0  0  0  0  0  0  0  0  0  0  0  0
   -0.6222    0.1510    0.0000 C   0  0  0  0  0  0  0  0  0  0  0  0
   -0.6222    0.9760    0.0000 C   0  0  0  0  0  0  0  0  0  0  0  0
   -1.3367    1.3885    0.0000 C   0  0  0  0  0  0  0  0  0  0  0  0
   -1.3367   -1.0865    0.0000 O   0  0  0  0  0  0  0  0  0  0  0  0
   -0.6222   -1.4990    0.0000 C   0  0  0  0  0  0  0  0  0  0  0  0
    0.0922   -1.0865    0.0000 C   0  0  0  0  0  0  0  0  0  0  0  0
    0.0922   -0.2615    0.0000 C   0  0  0  0  0  0  0  0  0  0  0  0
    0.8769   -1.3415    0.0000 C   0  0  0  0  0  0  0  0  0  0  0  0
    1.3618   -0.6740    0.0000 C   0  0  0  0  0  0  0  0  0  0  0  0
    0.8769   -0.0066    0.0000 C   0  0  0  0  0  0  0  0  0  0  0  0
    2.1823   -0.5878    0.0000 C   0  0  0  0  0  0  0  0  0  0  0  0
    2.5178    0.1659    0.0000 C   0  0  0  0  0  0  0  0  0  0  0  0
    2.0329    0.8333    0.0000 C   0  0  0  0  0  0  0  0  0  0  0  0
    1.2124    0.7471    0.0000 C   0  0  0  0  0  0  0  0  0  0  0  0
   -1.0347   -2.2135    0.0000 C   0  0  0  0  0  0  0  0  0  0  0  0
   -0.2097   -2.2135    0.0000 C   0  0  0  0  0  0  0  0  0  0  0  0
    0.0922   -1.9115    0.0000 H   0  0  0  0  0  0  0  0  0  0  0  0
    2.7656   -1.1711    0.0000 O   0  0  0  0  0  0  0  0  0  0  0  0
    2.4454    1.5478    0.0000 O   0  0  0  0  0  0  0  0  0  0  0  0
    0.0922    0.5635    0.0000 H   0  0  0  0  0  0  0  0  0  0  0  0
    0.1747    1.1895    0.0000 O   0  0  0  0  0  0  0  0  0  0  0  0
    0.1747    2.0145    0.0000 C   0  0  0  0  0  0  0  0  0  0  0  0
   -1.3367    2.2135    0.0000 Cl  0  0  0  0  0  0  0  0  0  0  0  0
   -2.7656    1.3885    0.0000 C   0  0  0  0  0  0  0  0  0  0  0  0
   -2.7656   -0.2615    0.0000 Cl  0  0  0  0  0  0  0  0  0  0  0  0
    1.5684    1.3665    0.0000 C   0  0  0  0  0  0  0  0  0  0  0  0
    2.2829    0.9540    0.0000 O   0  0  0  0  0  0  0  0  0  0  0  0
  1  2  2  0      
  2  3  1  0      
  3  4  2  0      
  4  5  1  0      
  5  6  2  0      
  6  1  1  0      
  3  7  1  0      
  7  8  1  0      
  8  9  1  0      
  9 10  1  0      
 10  4  1  0      
  9 11  1  0      
 11 12  1  0      
 12 13  2  0      
 13 10  1  0      
 12 14  1  0      
 14 15  2  0      
 15 16  1  0      
 16 17  2  0      
 17 13  1  0      
  8 18  1  0      
  8 19  1  0      
  9 20  1  6      
 14 21  1  0      
 16 22  1  0      
 10 23  1  6      
  5 24  1  0      
 24 25  1  0      
  6 26  1  0      
  1 27  1  0      
  2 28  1  0      
 17 29  1  0      
 29 30  2  0      
M  STY  1   1 SUP
M  SLB  1   1   1
M  SAL   1  2  29  30
M  SBL   1  1  32
M  SMT   1 CHO
M  SBV   1 32   -5.3738    4.4004
M  END
