# Supplementary material for: (±)-Pestalachloride D, an Antibacterial Racemate of Chlorinated Benzophenone Derivative from a Soft Coral-Derived Fungus Pestalotiopsis sp
Source: MDPI journal article supplement (doi:10.3390/md11041050), 2013-03-28
Supplement: s4 [file s4]

marinedrugs-11-01050-s002.mol
  corina  04151404253D 1   1.00000     0.00000 
CORINA 3.49 0023  12.04.2013
 30 33  0  0  0  0  0  0  0  0999 V2000
   -0.0072    1.2787    0.1257 C   0  0  0  0  0  0  0  0  0  0  0  0
    0.0477   -0.1023    0.1439 C   0  0  0  0  0  0  0  0  0  0  0  0
    1.2697   -0.7516    0.0922 C   0  0  0  0  0  0  0  0  0  0  0  0
    2.4463    0.0161   -0.0249 C   0  0  0  0  0  0  0  0  0  0  0  0
    2.3926    1.3781    0.0267 C   0  0  0  0  0  0  0  0  0  0  0  0
    1.1557    2.0228    0.0824 C   0  0  0  0  0  0  0  0  0  0  0  0
    1.3511   -2.0980    0.2183 O   0  0  0  0  0  0  0  0  0  0  0  0
    2.4753   -2.7460    0.8390 C   0  0  0  0  0  0  0  0  0  0  0  0
    3.5507   -1.7192    1.1007 C   0  0  0  0  0  0  0  0  0  0  0  0
    3.6486   -0.8559   -0.2052 C   0  0  0  0  0  0  0  0  0  0  0  0
    4.9908   -2.1521    1.3002 C   0  0  0  0  0  0  0  0  0  0  0  0
    5.7908   -1.0147    0.6976 C   0  0  0  0  0  0  0  0  0  0  0  0
    5.0215   -0.3261   -0.2291 C   0  0  0  0  0  0  0  0  0  0  0  0
    7.1033   -0.6483    0.9917 C   0  0  0  0  0  0  0  0  0  0  0  0
    7.6621    0.4028    0.2692 C   0  0  0  0  0  0  0  0  0  0  0  0
    6.9466    1.0406   -0.7242 C   0  0  0  0  0  0  0  0  0  0  0  0
    5.6216    0.6627   -1.0307 C   0  0  0  0  0  0  0  0  0  0  0  0
    2.0220   -3.3486    2.1740 C   0  0  0  0  0  0  0  0  0  0  0  0
    2.9753   -3.8643   -0.0726 C   0  0  0  0  0  0  0  0  0  0  0  0
    3.2354   -1.0753    1.9349 H   0  0  0  0  0  0  0  0  0  0  0  0
    7.8123   -1.2960    1.9500 O   0  0  0  0  0  0  0  0  0  0  0  0
    7.5281    2.0499   -1.4194 O   0  0  0  0  0  0  0  0  0  0  0  0
    3.4905   -1.4861   -1.0817 H   0  0  0  0  0  0  0  0  0  0  0  0
    3.5174    2.1388    0.0981 O   0  0  0  0  0  0  0  0  0  0  0  0
    3.9478    2.5398    1.4005 C   0  0  0  0  0  0  0  0  0  0  0  0
    1.0848    3.7577    0.0985 Cl  0  0  0  0  0  0  0  0  0  0  0  0
   -1.3437    1.9740    0.1471 C   0  0  0  0  0  0  0  0  0  0  0  0
   -1.4220   -1.0226    0.2313 Cl  0  0  0  0  0  0  0  0  0  0  0  0
    4.9389    1.2335   -2.1963 C   0  0  0  0  0  0  0  0  0  0  0  0
    5.5424    1.9615   -2.9566 O   0  0  0  0  0  0  0  0  0  0  0  0
  1  2  2  0      
  2  3  1  0      
  3  4  2  0      
  4  5  1  0      
  5  6  2  0      
  6  1  1  0      
  3  7  1  0      
  7  8  1  0      
  8  9  1  0      
  9 10  1  0      
 10  4  1  0      
  9 11  1  0      
 11 12  1  0      
 12 13  2  0      
 13 10  1  0      
 12 14  1  0      
 14 15  2  0      
 15 16  1  0      
 16 17  2  0      
 17 13  1  0      
  8 18  1  0      
  8 19  1  0      
 14 21  1  0      
 16 22  1  0      
 10 23  1  0      
  5 24  1  0      
 24 25  1  0      
  6 26  1  0      
  1 27  1  0      
  2 28  1  0      
  9 20  1  0      
 17 29  1  0      
 29 30  2  0      
M  STY  1   1 SUP
M  SLB  1   1   1
M  SAL   1  2  29  30
M  SBL   1  1  32
M  SMT   1 CHO
M  SBV   1 32   -5.5801    4.6066
M  END
$$$$
